# Supplementary material for: Development and Validation of a Simple LC-MS Method for the Quantification of Oxytocin in Dog Saliva
Source: MDPI journal article supplement (doi:10.3390/molecules24173079), 2019-08-24
Supplement: s1 [file s1]

1    **Development and validation of a simple LC-MS method for the quantification of oxytocin**  
2    **in dog saliva**

3

4    Lei Wang\*, Dakota W. Marti, Rachel E. Anderson

5    Nestlé Purina Research, Nestlé Purina PetCare, St. Joseph, MO 64503, USA.

6

7    \*To whom correspondence should be addressed:

8    Lei Wang, Nestlé Purina Research, Nestlé Purina PetCare, 3916 Pettis Road, St. Joseph, MO

9    64503, USA. Tel.: 816-387-4127; Email: Lei.Wang@rd.nestle.com.

**Supplemental Table S1: LC parameters**

| LC Parameters:           |                                                            |                    |
|--------------------------|------------------------------------------------------------|--------------------|
| Mobile Phase:            | A: 0.1% Acetic acid in water<br>B: 0.1% Acetic acid in ACN |                    |
| Gradient:                | Time (min)                                                 | Mobile Phase B (%) |
|                          | 0.01                                                       | 15                 |
|                          | 0.50                                                       | 15                 |
|                          | 1.00                                                       | 60                 |
|                          | 2.00                                                       | 70                 |
|                          | 2.01                                                       | 90                 |
|                          | 3.50                                                       | 90                 |
|                          | 4.00                                                       | 15                 |
|                          | 5.10                                                       | 15                 |
| Flow rate:               | 0.5 mL/min                                                 |                    |
| Sample injection volume: | 10 $\mu$ L                                                 |                    |
| Column temperature:      | 40°C                                                       |                    |

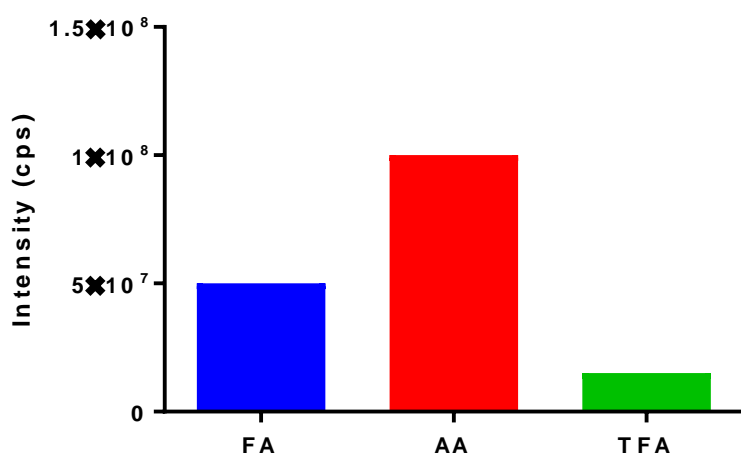

**Supplemental Figure S1:** OT signals in MS using different mobile phase additives. OT (100 ng/mL) was prepared in 50% aqueous ACN containing 0.1% formic acid (FA), 50% aqueous ACN containing 0.1% acetic acid (AA), or 50% aqueous ACN containing 0.1% trifluoroacetic acid (TFA). Samples were directly infused into MS system to acquire OT signal.

17

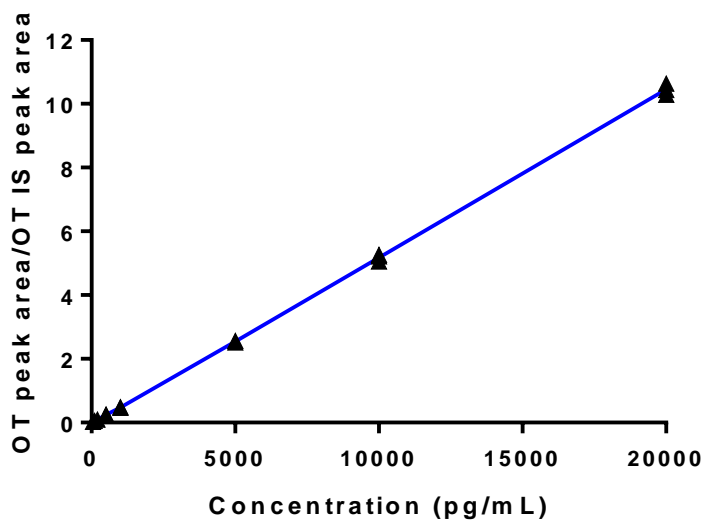

18

19 **Supplemental Figure S2:** Calibration standard curve of OT. Standard peak area ratio (peak  
20 area analyte/peak area internal standard) was used for calibration calculation. The standard  
21 concentrations included 50, 100, 200, 500, 1000, 5000, 10000, and 20000 pg/mL. All standards  
22 were prepared in triplicate. Linear equation:  $y=0.51768x-0.00051$ . Coefficient of  
23 determination:  $r^2 = 0.9996$ .
